# Supplementary material for: Detecting, mapping, and suppressing the spread of a decade-long Pseudomonas aeruginosa nosocomial outbreak with genomics
Source: eLife. 2025 Oct 29;13:RP93181. doi: 10.7554/eLife.93181 (PMC12571482; doi:10.7554/eLife.93181)
Supplement: Supplementary file 1. [file elife-93181-supp1.xlsx]

## Sheet: Sheet1
Sample #	Organism Name	Assembly Accession	Assembly Name	Patient #	Ward	Floor	Building	Collection Date	Isolation Source	Subclone	Isolate Type	Long Read Isolate
4605	Pseudomonas aeruginosa	GCA_024720725.1	ASM2472072v1	5	1	2	Main	2011-08-26	Respiratory	SC1	Primary: Patient-to-Patient Transmission	1
4606	Pseudomonas aeruginosa	GCA_024720695.1	ASM2472069v1	5	1	2	Main	2011-08-26	Respiratory	SC1	Serial	0
4607	Pseudomonas aeruginosa	GCA_024720675.1	ASM2472067v1	7	1	2	Main	2011-08-30	Urine	SC1	Primary: Patient-to-Patient Transmission	0
4608	Pseudomonas aeruginosa	GCA_024720605.1	ASM2472060v1	7	1	2	Main	2011-08-30	Urine	SC1	Serial	0
4610	Pseudomonas aeruginosa	GCA_024720615.1	ASM2472061v1	5	1	2	Main	2011-09-06	Respiratory	SC1	Serial	0
4938	Pseudomonas aeruginosa	GCA_024720525.1	ASM2472052v1	5	1	2	Main	2011-09-12	Respiratory	SC1	Serial	0
4840	Pseudomonas aeruginosa	GCA_024720655.1	ASM2472065v1	7	1	2	Main	2011-10-03	Respiratory	SC1	Serial	0
4844	Pseudomonas aeruginosa	GCA_024720575.1	ASM2472057v1	7	1	2	Main	2011-10-14	Respiratory	SC1	Serial	0
4843	Pseudomonas aeruginosa	GCA_024720595.1	ASM2472059v1	7	1	2	Main	2011-10-14	Urine	SC1	Serial	0
5395	Pseudomonas aeruginosa	GCA_024720515.1	ASM2472051v1	7	1	2	Main	2011-10-21	Respiratory	SC1	Serial	0
6226	Pseudomonas aeruginosa	GCA_024720385.1	ASM2472038v1	7	1	2	Main	2011-10-27	Respiratory	SC1	Serial	0
5397	Pseudomonas aeruginosa	GCA_024720485.1	ASM2472048v1	7	1	2	Main	2011-10-29	Respiratory	SC1	Serial	0
5394	Pseudomonas aeruginosa	GCA_024720555.1	ASM2472055v1	7	1	2	Main	2011-11-11	Respiratory	SC1	Serial	0
5709	Pseudomonas aeruginosa	GCA_024720475.1	ASM2472047v1	9	1	2	Main	2011-11-20	Respiratory	SC1	Primary: Patient-to-Patient Transmission	0
6228	Pseudomonas aeruginosa	GCA_024720325.1	ASM2472032v1	9	1	2	Main	2011-11-29	Respiratory	SC1	Serial	0
6230	Pseudomonas aeruginosa	GCA_024720355.1	ASM2472035v1	11	1	2	Main	2011-12-13	Respiratory	SC1	Primary: Patient-to-Patient Transmission	0
6992	Pseudomonas aeruginosa	GCA_024719935.1	ASM2471993v1	14	1	2	Main	2012-02-07	Urine	SC1	Primary: Patient-to-Patient Transmission	0
6994	Pseudomonas aeruginosa	GCA_024719975.1	ASM2471997v1	15	1	2	Main	2012-02-10	Respiratory	SC1	Primary: Patient-to-Patient Transmission	0
6995	Pseudomonas aeruginosa	GCA_024719925.1	ASM2471992v1	15	1	2	Main	2012-02-12	Respiratory	SC1	Serial	0
6996	Pseudomonas aeruginosa	GCA_024719915.1	ASM2471991v1	15	1	2	Main	2012-02-12	Respiratory	SC1	Serial	0
6998	Pseudomonas aeruginosa	GCA_024719895.1	ASM2471989v1	14	1	2	Main	2012-02-14	Urine	SC1	Serial	0
6981	Pseudomonas aeruginosa	GCA_024720035.1	ASM2472003v1	14	1	2	Main	2012-02-18	Urine	SC1	Serial	0
6983	Pseudomonas aeruginosa	GCA_024720055.1	ASM2472005v1	15	1	2	Main	2012-02-20	Respiratory	SC1	Serial	0
6984	Pseudomonas aeruginosa	GCA_024720015.1	ASM2472001v1	15	1	2	Main	2012-02-20	Urine	SC1	Serial	0
8230	Pseudomonas aeruginosa	GCA_024719815.1	ASM2471981v1	15	1	2	Main	2012-02-28	Respiratory	SC1	Serial	0
8231	Pseudomonas aeruginosa	GCA_024719835.1	ASM2471983v1	15	1	2	Main	2012-02-28	Respiratory	SC1	Serial	0
8236	Pseudomonas aeruginosa	GCA_024719795.1	ASM2471979v1	15	1	2	Main	2012-03-13	Respiratory	SC1	Serial	0
8222	Pseudomonas aeruginosa	GCA_024719875.1	ASM2471987v1	15	1	2	Main	2012-03-31	Respiratory	SC1	Serial	0
9969	Pseudomonas aeruginosa	GCA_024719695.1	ASM2471969v1	21	1	2	Main	2012-06-13	Respiratory	SC1	Primary	0
11335	Pseudomonas aeruginosa	GCA_024719635.1	ASM2471963v1	22	1	2	Main	2012-08-13	Urine	SC1	Serial	0
11376	Pseudomonas aeruginosa	GCA_024719585.1	ASM2471958v1	22	1	2	Main	2012-08-19	Urine	SC1	Serial	0
11488	Pseudomonas aeruginosa	GCA_024719555.1	ASM2471955v1	22	1	2	Main	2012-09-02	Respiratory	SC1	Serial	0
11537	Pseudomonas aeruginosa	GCA_024719535.1	ASM2471953v1	22	1	2	Main	2012-09-07	Respiratory	SC1	Serial	0
11934	Pseudomonas aeruginosa	GCA_024719515.1	ASM2471951v1	22	1	2	Main	2012-09-16	Respiratory	SC1	Serial	0
12426	Pseudomonas aeruginosa	GCA_024719495.1	ASM2471949v1	25	1	2	Main	2012-10-19	Respiratory	SC1	Primary	0
12427	Pseudomonas aeruginosa	GCA_024719435.1	ASM2471943v1	25	1	2	Main	2012-10-24	Respiratory	SC1	Serial	0
16340	Pseudomonas aeruginosa	GCA_024719245.1	ASM2471924v1	30	1	2	Main	2013-04-08	Surveillance	SC1	Primary: Environmental Transmission	0
16343	Pseudomonas aeruginosa	GCA_024719205.1	ASM2471920v1	30	1	2	Main	2013-04-09	Respiratory	SC1	Serial	0
16382	Pseudomonas aeruginosa	GCA_024719185.1	ASM2471918v1	31	1	2	Main	2013-04-15	Surveillance	SC1	Primary	0
16389	Pseudomonas aeruginosa	GCA_024719115.1	ASM2471911v1	31	1	2	Main	2013-04-28	Respiratory	SC1	Serial	0
16388	Pseudomonas aeruginosa	GCA_024719165.1	ASM2471916v1	31	1	2	Main	2013-04-28	Urine	SC1	Serial	0
16395	Pseudomonas aeruginosa	GCA_024719085.1	ASM2471908v1	31	1	2	Main	2013-05-01	Respiratory	SC1	Serial	0
22479	Pseudomonas aeruginosa	GCA_024718655.1	ASM2471865v1	41	1	2	Main	2014-03-25	Respiratory	SC1	Primary	0
670776	Pseudomonas aeruginosa	GCA_024714765.1	ASM2471476v1	76	1	2	Main	2019-08-18	Respiratory	SC1	Primary: Environmental Transmission	0
827222	Pseudomonas aeruginosa	GCA_024714635.1	ASM2471463v1	80	1	2	Main	2020-09-27	Respiratory	SC1	Primary: Environmental Transmission	0
834054	Pseudomonas aeruginosa	GCA_024714615.1	ASM2471461v1	80	1	2	Main	2020-10-01	Respiratory	SC1	Serial	0
850720	Pseudomonas aeruginosa	GCA_024714595.1	ASM2471459v1	81	1	2	Main	2020-11-14	Respiratory	SC1	Primary: Environmental Transmission	0
5710	Pseudomonas aeruginosa	GCA_024720455.1	ASM2472045v1	10	2	2	Main	2011-11-21	Tissue	SC1	Primary	0
11978	Pseudomonas aeruginosa	GCA_024719475.1	ASM2471947v1	24	2	2	Main	2012-09-27	Respiratory	SC1	Primary	0
15738	Pseudomonas aeruginosa	GCA_024719295.1	ASM2471929v1	28	2	2	Main	2013-03-13	Urine	SC1	Primary	0
22526	Pseudomonas aeruginosa	GCA_024718585.1	ASM2471858v1	40	2	2	Main	2014-04-03	Surveillance	SC1	Serial	0
22527	Pseudomonas aeruginosa	GCA_024717435.1	ASM2471743v1	40	2	2	Main	2014-04-03	Surveillance	SC1	Serial	0
22528	Pseudomonas aeruginosa	GCA_024717345.1	ASM2471734v1	40	2	2	Main	2014-04-03	Surveillance	SC1	Serial	0
22529	Pseudomonas aeruginosa	GCA_024717415.1	ASM2471741v1	39	2	2	Main	2014-04-10	Wound	SC1	Serial	0
23253	Pseudomonas aeruginosa	GCA_024717275.1	ASM2471727v1	45	2	2	Main	2014-05-20	Respiratory	SC1	Primary	0
23296	Pseudomonas aeruginosa	GCA_024717155.1	ASM2471715v1	45	2	2	Main	2014-05-25	Respiratory	SC1	Serial	0
24489	Pseudomonas aeruginosa	GCA_024717115.1	ASM2471711v1	47	2	2	Main	2014-07-14	Urine	SC1	Primary: Environmental Transmission	0
24533	Pseudomonas aeruginosa	GCA_024717125.1	ASM2471712v1	47	2	2	Main	2014-07-16	Respiratory	SC1	Serial	0
29335	Pseudomonas aeruginosa	GCA_024716685.1	ASM2471668v1	51	2	2	Main	2015-03-28	Urine	SC1	Primary	0
354187	Pseudomonas aeruginosa	GCA_024716335.1	ASM2471633v1	56	2	2	Main	2015-10-18	Tissue	SC1	Primary	0
406541	Pseudomonas aeruginosa	GCA_024715835.1	ASM2471583v1	60	2	2	Main	2016-05-19	Urine	SC2	Serial	0
407045	Pseudomonas aeruginosa	GCA_024715895.1	ASM2471589v1	64	2	2	Main	2016-06-20	Wound	SC1	Primary	0
407054	Pseudomonas aeruginosa	GCA_024715815.1	ASM2471581v1	64	2	2	Main	2016-06-20	Wound	SC1	Serial	0
6245	Pseudomonas aeruginosa	GCA_024720295.1	ASM2472029v1	1	3	2	Main	2011-05-19	Surveillance	SC1	Primary	1
6246	Pseudomonas aeruginosa	GCA_024720235.1	ASM2472023v1	1	3	2	Main	2011-05-19	Surveillance	SC1	Serial	1
17460	Pseudomonas aeruginosa	GCA_024719065.1	ASM2471906v1	32	3	2	Main	2013-07-03	Urine	SC1	Serial	0
19760	Pseudomonas aeruginosa	GCA_024718835.1	ASM2471883v1	36	3	2	Main	2013-11-22	Respiratory	SC1	Primary	0
23299	Pseudomonas aeruginosa	GCA_024717175.1	ASM2471717v1	46	3	2	Main	2014-06-04	Urine	SC1	Serial	0
23300	Pseudomonas aeruginosa	GCA_024717215.1	ASM2471721v1	46	3	2	Main	2014-06-07	Urine	SC1	Serial	0
406514	Pseudomonas aeruginosa	GCA_024715875.1	ASM2471587v1	60	3	2	Main	2016-05-11	Urine	SC2	Serial	0
552901	Pseudomonas aeruginosa	GCA_024714975.1	ASM2471497v1	35	3	2	Main	2018-01-29	Urine	SC2	Serial	0
10240	Pseudomonas aeruginosa	GCA_024719675.1	ASM2471967v1	22	4	2	Main	2012-07-20	Urine	SC1	Primary	0
10241	Pseudomonas aeruginosa	GCA_024719655.1	ASM2471965v1	22	4	2	Main	2012-07-21	Urine	SC1	Serial	0
10242	Pseudomonas aeruginosa	GCA_024719615.1	ASM2471961v1	22	4	2	Main	2012-07-21	Urine	SC1	Serial	0
11536	Pseudomonas aeruginosa	GCA_024719575.1	ASM2471957v1	23	4	2	Main	2012-09-04	Wound	SC1	Primary	0
757123	Pseudomonas aeruginosa	GCA_024714695.1	ASM2471469v1	78	4	2	Main	2020-02-22	Respiratory	SC1	Primary: Environmental Transmission	0
779159	Pseudomonas aeruginosa	GCA_024714665.1	ASM2471466v1	79	4	2	Main	2020-05-24	Wound	SC1	Primary	0
22480	Pseudomonas aeruginosa	GCA_024718625.1	ASM2471862v1	35	5	2	Main	2014-03-28	Urine	SC2	Serial	0
30634	Pseudomonas aeruginosa	GCA_024716515.1	ASM2471651v1	49	5	2	Main	2015-06-22	Urine	SC2	Serial	0
359784	Pseudomonas aeruginosa	GCA_024716055.1	ASM2471605v1	60	5	2	Main	2016-01-06	Urine	SC2	Primary	0
375658	Pseudomonas aeruginosa	GCA_024716015.1	ASM2471601v1	60	5	2	Main	2016-02-04	Urine	SC2	Serial	0
391498	Pseudomonas aeruginosa	GCA_024715925.1	ASM2471592v1	60	5	2	Main	2016-04-13	Urine	SC2	Serial	0
451392	Pseudomonas aeruginosa	GCA_024715515.1	ASM2471551v1	70	5	2	Main	2017-01-18	Urine	SC2	Serial	0
451569	Pseudomonas aeruginosa	GCA_024715505.1	ASM2471550v1	70	5	2	Main	2017-01-25	Urine	SC2	Serial	0
529277	Pseudomonas aeruginosa	GCA_024715115.1	ASM2471511v1	10	5	2	Main	2017-11-15	Urine	SC1	Serial	0
6225	Pseudomonas aeruginosa	GCA_024720375.1	ASM2472037v1	8	6	3	Main	2011-10-26	Urine	SC1	Primary	0
6675	Pseudomonas aeruginosa	GCA_024720155.1	ASM2472015v1	13	6	3	Main	2012-01-20	Surveillance	SC1	Primary	0
6988	Pseudomonas aeruginosa	GCA_024719995.1	ASM2471999v1	16	6	3	Main	2012-02-16	Wound	SC1	Primary	0
6980	Pseudomonas aeruginosa	GCA_024720065.1	ASM2472006v1	15	6	3	Main	2012-02-18	Urine	SC1	Serial	0
14598	Pseudomonas aeruginosa	GCA_024719315.1	ASM2471931v1	27	6	3	Main	2012-12-27	Wound	SC2	Serial	0
15681	Pseudomonas aeruginosa	GCA_024719335.1	ASM2471933v1	27	6	3	Main	2013-02-27	Respiratory	SC2	Serial	1
16386	Pseudomonas aeruginosa	GCA_024719195.1	ASM2471919v1	32	6	3	Main	2013-04-22	Respiratory	SC1	Primary	0
18853	Pseudomonas aeruginosa	GCA_024718915.1	ASM2471891v1	27	6	3	Main	2013-09-16	Surveillance	SC2	Serial	0
18854	Pseudomonas aeruginosa	GCA_024718875.1	ASM2471887v1	27	6	3	Main	2013-09-16	Surveillance	SC2	Serial	0
18856	Pseudomonas aeruginosa	GCA_024718885.1	ASM2471888v1	27	6	3	Main	2013-09-17	Respiratory	SC2	Serial	0
23256	Pseudomonas aeruginosa	GCA_024717235.1	ASM2471723v1	39	6	3	Main	2014-05-11	Urine	SC1	Serial	0
27549	Pseudomonas aeruginosa	GCA_024716735.1	ASM2471673v1	44	6	3	Main	2014-12-01	Respiratory	SC2	Serial	0
28617	Pseudomonas aeruginosa	GCA_024716705.1	ASM2471670v1	38	6	3	Main	2015-02-15	Respiratory	SC2	Serial	0
451879	Pseudomonas aeruginosa	GCA_024715395.1	ASM2471539v1	35	6	3	Main	2017-02-03	Urine	SC2	Serial	0
451967	Pseudomonas aeruginosa	GCA_024715425.1	ASM2471542v1	69	6	3	Main	2017-02-06	Urine	SC2	Serial	0
467162	Pseudomonas aeruginosa	GCA_024715325.1	ASM2471532v1	34	6	3	Main	2017-04-13	Tissue	SC2	Serial	0
467029	Pseudomonas aeruginosa	GCA_024715295.1	ASM2471529v1	34	6	3	Main	2017-04-13	Wound	SC2	Serial	0
855190	Pseudomonas aeruginosa	GCA_024714565.1	ASM2471456v1	81	6	3	Main	2020-11-28	Respiratory	SC1	Serial	0
861188	Pseudomonas aeruginosa	GCA_024714515.1	ASM2471451v1	81	6	3	Main	2020-12-12	Respiratory	SC1	Serial	0
15740	Pseudomonas aeruginosa	GCA_024719275.1	ASM2471927v1	29	7	3	Main	2013-03-22	Respiratory	SC2	Primary	0
17848	Pseudomonas aeruginosa	GCA_024719045.1	ASM2471904v1	34	7	3	Main	2013-08-19	Wound	SC2	Primary	0
23194	Pseudomonas aeruginosa	GCA_024717375.1	ASM2471737v1	43	7	3	Main	2014-04-17	Respiratory	SC1	Primary	0
30533	Pseudomonas aeruginosa	GCA_024716655.1	ASM2471665v1	35	7	3	Main	2015-05-07	Urine	SC2	Serial	0
19712	Pseudomonas aeruginosa	GCA_024718855.1	ASM2471885v1	35	8	3	Tower	2013-11-12	Urine	SC2	Primary	0
27010	Pseudomonas aeruginosa	GCA_024716765.1	ASM2471676v1	49	8	3	Tower	2014-10-10	Urine	SC2	Primary	0
14550	Pseudomonas aeruginosa	GCA_024719395.1	ASM2471939v1	26	9	3	Main	2012-12-08	Respiratory	SC1	Serial	0
21228	Pseudomonas aeruginosa	GCA_024718735.1	ASM2471873v1	38	9	3	Main	2014-03-09	Respiratory	SC2	Primary	0
22524	Pseudomonas aeruginosa	GCA_024718605.1	ASM2471860v1	39	9	3	Main	2014-04-11	Wound	SC1	Serial	0
11980	Pseudomonas aeruginosa	GCA_024719455.1	ASM2471945v1	18	10	3	Tower	2012-09-27	Respiratory	SC1	Serial	0
25675	Pseudomonas aeruginosa	GCA_024717075.1	ASM2471707v1	38	10	3	Tower	2014-09-10	Respiratory	SC2	Serial	1
18802	Pseudomonas aeruginosa	GCA_024718985.1	ASM2471898v1	33	11	4	Main	2013-08-27	Wound	SC2	Serial	0
18806	Pseudomonas aeruginosa	GCA_024718935.1	ASM2471893v1	33	11	4	Main	2013-09-03	Wound	SC2	Serial	0
461803	Pseudomonas aeruginosa	GCA_024715365.1	ASM2471536v1	34	11	4	Main	2017-03-13	Tissue	SC2	Serial	0
461812	Pseudomonas aeruginosa	GCA_024715315.1	ASM2471531v1	34	11	4	Main	2017-03-13	Tissue	SC2	Serial	0
6247	Pseudomonas aeruginosa	GCA_024720275.1	ASM2472027v1	2	12	4	Main	2011-06-02	Respiratory	SC1	Primary	0
6251	Pseudomonas aeruginosa	GCA_024720195.1	ASM2472019v1	2	12	4	Main	2011-06-13	Urine	SC1	Serial	0
6212	Pseudomonas aeruginosa	GCA_024720435.1	ASM2472043v1	2	12	4	Main	2011-06-23	Urine	SC1	Serial	0
6249	Pseudomonas aeruginosa	GCA_024720215.1	ASM2472021v1	3	13	4	Main	2011-06-06	Respiratory	SC1	Primary	0
6250	Pseudomonas aeruginosa	GCA_024720245.1	ASM2472024v1	3	13	4	Main	2011-06-10	Wound	SC1	Serial	0
6242	Pseudomonas aeruginosa	GCA_024720315.1	ASM2472031v1	12	14	4	Main	2011-12-26	Urine	SC1	Primary	0
6688	Pseudomonas aeruginosa	GCA_024720115.1	ASM2472011v1	12	14	4	Main	2012-01-03	Surveillance	SC1	Serial	0
6689	Pseudomonas aeruginosa	GCA_024720135.1	ASM2472013v1	12	14	4	Main	2012-01-03	Surveillance	SC1	Serial	0
6684	Pseudomonas aeruginosa	GCA_024720165.1	ASM2472016v1	12	14	4	Main	2012-01-03	Urine	SC1	Serial	0
6690	Pseudomonas aeruginosa	GCA_024720095.1	ASM2472009v1	12	14	4	Main	2012-01-05	Urine	SC1	Serial	0
9872	Pseudomonas aeruginosa	GCA_024719735.1	ASM2471973v1	19	14	4	Main	2012-06-10	Respiratory	SC1	Serial	0
19762	Pseudomonas aeruginosa	GCA_024718815.1	ASM2471881v1	37	15	5	Main	2013-11-28	Urine	SC1	Primary	0
454265	Pseudomonas aeruginosa	GCA_024715355.1	ASM2471535v1	72	16	5	Main	2017-02-19	Urine	SC2	Primary	0
20554	Pseudomonas aeruginosa	GCA_024718795.1	ASM2471879v1	35	17	6	Main	2013-12-10	Urine	SC2	Serial	0
20555	Pseudomonas aeruginosa	GCA_024718775.1	ASM2471877v1	35	17	6	Main	2013-12-10	Urine	SC2	Serial	0
30986	Pseudomonas aeruginosa	GCA_024716435.1	ASM2471643v1	53	18	6	Main	2015-06-29	Urine	SC2	Serial	0
345709	Pseudomonas aeruginosa	GCA_024716395.1	ASM2471639v1	58	18	6	Main	2015-11-06	Urine	SC2	Primary	0
359845	Pseudomonas aeruginosa	GCA_024716095.1	ASM2471609v1	49	18	6	Main	2016-01-13	Urine	SC2	Serial	0
436366	Pseudomonas aeruginosa	GCA_024715575.1	ASM2471557v1	69	18	6	Main	2016-11-06	Urine	SC2	Primary	0
473349	Pseudomonas aeruginosa	GCA_024715195.1	ASM2471519v1	49	18	6	Main	2017-05-18	Urine	SC2	Serial	0
490896	Pseudomonas aeruginosa	GCA_024715135.1	ASM2471513v1	35	18	6	Main	2017-07-28	Urine	SC2	Serial	0
535995	Pseudomonas aeruginosa	GCA_024715095.1	ASM2471509v1	35	18	6	Main	2017-11-24	Urine	SC2	Serial	0
6221	Pseudomonas aeruginosa	GCA_024720415.1	ASM2472041v1	4	19	7	Main	2011-07-12	Respiratory	N/A	Primary	0
4604	Pseudomonas aeruginosa	GCA_024720715.1	ASM2472071v1	6	19	7	Main	2011-08-26	Surveillance	SC1	Primary	0
14596	Pseudomonas aeruginosa	GCA_024719375.1	ASM2471937v1	27	20	3	Tower	2012-12-24	Tissue	SC2	Primary	1
14597	Pseudomonas aeruginosa	GCA_024719355.1	ASM2471935v1	27	20	3	Tower	2012-12-24	Tissue	SC2	Serial	1
18712	Pseudomonas aeruginosa	GCA_024719025.1	ASM2471902v1	33	20	3	Tower	2013-09-20	Wound	SC2	Serial	0
22525	Pseudomonas aeruginosa	GCA_024718565.1	ASM2471856v1	42	20	3	Tower	2014-04-15	Urine	SC1	Primary	0
23254	Pseudomonas aeruginosa	GCA_024717315.1	ASM2471731v1	44	20	3	Tower	2014-05-05	Respiratory	SC2	Primary	1
23255	Pseudomonas aeruginosa	GCA_024717285.1	ASM2471728v1	44	20	3	Tower	2014-05-05	Respiratory	SC2	Serial	1
25717	Pseudomonas aeruginosa	GCA_024717035.1	ASM2471703v1	38	20	3	Tower	2014-09-26	Respiratory	SC2	Serial	0
25718	Pseudomonas aeruginosa	GCA_024717055.1	ASM2471705v1	38	20	3	Tower	2014-09-28	Respiratory	SC2	Serial	1
27003	Pseudomonas aeruginosa	GCA_024716875.1	ASM2471687v1	38	20	3	Tower	2014-10-02	Respiratory	SC2	Serial	0
26960	Pseudomonas aeruginosa	GCA_024716995.1	ASM2471699v1	27	20	3	Tower	2014-10-31	Respiratory	SC2	Serial	0
28615	Pseudomonas aeruginosa	GCA_024716815.1	ASM2471681v1	27	20	3	Tower	2015-02-11	Respiratory	SC2	Serial	0
28674	Pseudomonas aeruginosa	GCA_024716635.1	ASM2471663v1	27	20	3	Tower	2015-02-15	Respiratory	SC2	Serial	0
30630	Pseudomonas aeruginosa	GCA_024716575.1	ASM2471657v1	54	20	3	Tower	2015-06-08	Blood	SC1	Serial	0
30587	Pseudomonas aeruginosa	GCA_024716555.1	ASM2471655v1	54	20	3	Tower	2015-06-08	Respiratory	SC1	Primary: Patient-to-Patient Transmission	0
30629	Pseudomonas aeruginosa	GCA_024716525.1	ASM2471652v1	54	20	3	Tower	2015-06-08	Wound	SC1	Serial	0
30631	Pseudomonas aeruginosa	GCA_024716475.1	ASM2471647v1	54	20	3	Tower	2015-06-09	Blood	SC1	Serial	0
30632	Pseudomonas aeruginosa	GCA_024716455.1	ASM2471645v1	54	20	3	Tower	2015-06-10	Respiratory	SC1	Serial	0
30989	Pseudomonas aeruginosa	GCA_024716375.1	ASM2471637v1	55	20	3	Tower	2015-07-11	Urine	SC1	Primary: Patient-to-Patient Transmission	0
354585	Pseudomonas aeruginosa	GCA_024716255.1	ASM2471625v1	57	20	3	Tower	2015-10-30	Blood	SC2	Primary: Environmental Transmission	0
354594	Pseudomonas aeruginosa	GCA_024716305.1	ASM2471630v1	57	20	3	Tower	2015-10-30	Respiratory	SC2	Serial	0
354600	Pseudomonas aeruginosa	GCA_024716225.1	ASM2471622v1	57	20	3	Tower	2015-11-04	Respiratory	SC2	Serial	0
345754	Pseudomonas aeruginosa	GCA_024716405.1	ASM2471640v1	57	20	3	Tower	2015-11-12	Respiratory	SC2	Serial	0
345806	Pseudomonas aeruginosa	GCA_024716295.1	ASM2471629v1	57	20	3	Tower	2015-11-18	Respiratory	SC2	Serial	0
358749	Pseudomonas aeruginosa	GCA_024716215.1	ASM2471621v1	59	20	3	Tower	2015-11-21	Respiratory	SC2	Primary	0
358758	Pseudomonas aeruginosa	GCA_024716275.1	ASM2471627v1	57	20	3	Tower	2015-11-21	Respiratory	SC2	Serial	0
358767	Pseudomonas aeruginosa	GCA_024716175.1	ASM2471617v1	57	20	3	Tower	2015-11-21	Respiratory	SC2	Serial	0
358776	Pseudomonas aeruginosa	GCA_024716185.1	ASM2471618v1	59	20	3	Tower	2015-11-22	Respiratory	SC2	Serial	0
358785	Pseudomonas aeruginosa	GCA_024716115.1	ASM2471611v1	57	20	3	Tower	2015-11-23	Respiratory	SC2	Serial	0
358794	Pseudomonas aeruginosa	GCA_024716155.1	ASM2471615v1	59	20	3	Tower	2015-11-23	Respiratory	SC2	Serial	0
359809	Pseudomonas aeruginosa	GCA_024716135.1	ASM2471613v1	61	20	3	Tower	2016-01-10	Urine	SC2	Primary: Environmental Transmission	0
359854	Pseudomonas aeruginosa	GCA_024716035.1	ASM2471603v1	61	20	3	Tower	2016-01-13	Urine	SC2	Serial	0
546742	Pseudomonas aeruginosa	GCA_024715015.1	ASM2471501v1	74	20	3	Tower	2018-01-27	Respiratory	SC2	Primary: Environmental Transmission	0
552895	Pseudomonas aeruginosa	GCA_024714935.1	ASM2471493v1	74	20	3	Tower	2018-01-29	Respiratory	SC2	Serial	0
553034	Pseudomonas aeruginosa	GCA_024714915.1	ASM2471491v1	74	20	3	Tower	2018-02-03	Respiratory	SC2	Serial	0
553043	Pseudomonas aeruginosa	GCA_024714955.1	ASM2471495v1	74	20	3	Tower	2018-02-04	Respiratory	SC2	Serial	0
556396	Pseudomonas aeruginosa	GCA_024714845.1	ASM2471484v1	74	20	3	Tower	2018-02-25	Respiratory	SC2	Serial	0
646320	Pseudomonas aeruginosa	GCA_024714795.1	ASM2471479v1	75	20	3	Tower	2019-04-08	Respiratory	SC2	Primary	0
675734	Pseudomonas aeruginosa	GCA_024714755.1	ASM2471475v1	77	20	3	Tower	2019-09-02	Respiratory	SC2	Primary: Environmental Transmission	0
675776	Pseudomonas aeruginosa	GCA_024714735.1	ASM2471473v1	77	20	3	Tower	2019-09-04	Respiratory	SC2	Serial	0
860676	Pseudomonas aeruginosa	GCA_024714555.1	ASM2471455v1	82	20	3	Tower	2020-12-05	Urine	SC2	Primary: Environmental Transmission	0
860802	Pseudomonas aeruginosa	GCA_024714535.1	ASM2471453v1	82	20	3	Tower	2020-12-07	Urine	SC2	Serial	0
12428	Pseudomonas aeruginosa	GCA_024719405.1	ASM2471940v1	26	21	3	Tower	2012-10-25	Other	SC1	Primary	0
24485	Pseudomonas aeruginosa	GCA_024717195.1	ASM2471719v1	38	21	3	Tower	2014-07-01	Respiratory	SC2	Serial	0
27002	Pseudomonas aeruginosa	GCA_024716895.1	ASM2471689v1	44	21	3	Tower	2014-10-01	Urine	SC2	Serial	0
27008	Pseudomonas aeruginosa	GCA_024716825.1	ASM2471682v1	38	21	3	Tower	2014-10-06	Respiratory	SC2	Serial	0
27009	Pseudomonas aeruginosa	GCA_024716785.1	ASM2471678v1	48	21	3	Tower	2014-10-10	Urine	SC2	Primary	0
26915	Pseudomonas aeruginosa	GCA_024717065.1	ASM2471706v1	27	21	3	Tower	2014-10-16	Urine	SC2	Serial	0
26917	Pseudomonas aeruginosa	GCA_024716975.1	ASM2471697v1	44	21	3	Tower	2014-10-24	Respiratory	SC2	Serial	0
26959	Pseudomonas aeruginosa	GCA_024717015.1	ASM2471701v1	44	21	3	Tower	2014-10-29	Respiratory	SC2	Serial	0
26962	Pseudomonas aeruginosa	GCA_024716905.1	ASM2471690v1	27	21	3	Tower	2014-11-06	Respiratory	SC2	Serial	0
26964	Pseudomonas aeruginosa	GCA_024716945.1	ASM2471694v1	27	21	3	Tower	2014-11-13	Respiratory	SC2	Serial	0
26965	Pseudomonas aeruginosa	GCA_024716935.1	ASM2471693v1	44	21	3	Tower	2014-11-13	Respiratory	SC2	Serial	0
27544	Pseudomonas aeruginosa	GCA_024716755.1	ASM2471675v1	44	21	3	Tower	2014-11-22	Respiratory	SC2	Serial	0
391957	Pseudomonas aeruginosa	GCA_024715915.1	ASM2471591v1	63	21	3	Tower	2016-05-03	Urine	SC2	Primary	0
416663	Pseudomonas aeruginosa	GCA_024715695.1	ASM2471569v1	65	21	3	Tower	2016-07-26	Respiratory	SC2	Primary	0
416681	Pseudomonas aeruginosa	GCA_024715735.1	ASM2471573v1	65	21	3	Tower	2016-07-28	Respiratory	SC2	Serial	0
417398	Pseudomonas aeruginosa	GCA_024715675.1	ASM2471567v1	65	21	3	Tower	2016-08-04	Respiratory	SC2	Serial	0
415947	Pseudomonas aeruginosa	GCA_024715795.1	ASM2471579v1	66	21	3	Tower	2016-08-31	Respiratory	SC2	Primary	0
427164	Pseudomonas aeruginosa	GCA_024715725.1	ASM2471572v1	68	21	3	Tower	2016-09-06	Urine	SC1	Primary	0
588784	Pseudomonas aeruginosa	GCA_024714835.1	ASM2471483v1	63	21	3	Tower	2018-07-12	Respiratory	SC2	Serial	0
589084	Pseudomonas aeruginosa	GCA_024714895.1	ASM2471489v1	63	21	3	Tower	2018-07-18	Respiratory	SC2	Serial	0
591414	Pseudomonas aeruginosa	GCA_024714865.1	ASM2471486v1	63	21	3	Tower	2018-07-26	Respiratory	SC2	Serial	0
591566	Pseudomonas aeruginosa	GCA_024714815.1	ASM2471481v1	63	21	3	Tower	2018-07-30	Respiratory	SC2	Serial	0
696530	Pseudomonas aeruginosa	GCA_024714715.1	ASM2471471v1	77	21	3	Tower	2019-11-02	Respiratory	SC2	Serial	0
9455	Pseudomonas aeruginosa	GCA_024719725.1	ASM2471972v1	19	22	4	Tower	2012-05-05	Urine	SC1	Primary	0
393919	Pseudomonas aeruginosa	GCA_024715975.1	ASM2471597v1	62	22	4	Tower	2016-03-10	Urine	SC2	Primary	0
375065	Pseudomonas aeruginosa	GCA_024715995.1	ASM2471599v1	61	23	5	Tower	2016-01-17	Urine	SC2	Serial	0
375135	Pseudomonas aeruginosa	GCA_024716075.1	ASM2471607v1	61	23	5	Tower	2016-01-29	Surveillance	SC2	Serial	0
473376	Pseudomonas aeruginosa	GCA_024715255.1	ASM2471525v1	70	23	5	Tower	2017-05-18	Blood	SC2	Serial	0
482055	Pseudomonas aeruginosa	GCA_024715205.1	ASM2471520v1	70	23	5	Tower	2017-06-21	Blood	SC2	Serial	0
490434	Pseudomonas aeruginosa	GCA_024715175.1	ASM2471517v1	70	23	5	Tower	2017-07-11	Other	SC2	Serial	0
22475	Pseudomonas aeruginosa	GCA_024718695.1	ASM2471869v1	39	24	2	Tower	2014-03-20	Respiratory	SC1	Primary	0
22477	Pseudomonas aeruginosa	GCA_024718675.1	ASM2471867v1	40	24	2	Tower	2014-03-23	Respiratory	SC1	Primary	0
8223	Pseudomonas aeruginosa	GCA_024719845.1	ASM2471984v1	18	25	7	Tower	2012-04-03	Respiratory	SC1	Primary	0
17956	Pseudomonas aeruginosa	GCA_024719005.1	ASM2471900v1	33	25	7	Tower	2013-08-09	Wound	SC2	Primary	0
764375	Pseudomonas aeruginosa	GCA_024714655.1	ASM2471465v1	78	25	7	Tower	2020-04-07	Wound	SC1	Serial	0
8232	Pseudomonas aeruginosa	GCA_024719775.1	ASM2471977v1	17	ER	1	Main	2012-02-27	Urine	SC1	Primary	0
9891	Pseudomonas aeruginosa	GCA_024719715.1	ASM2471971v1	20	ER	1	Main	2012-06-02	Urine	SC1	Primary	1
23298	Pseudomonas aeruginosa	GCA_024717255.1	ASM2471725v1	46	ER	1	Main	2014-06-03	Urine	SC1	Primary	0
26966	Pseudomonas aeruginosa	GCA_024716855.1	ASM2471685v1	50	ER	1	Main	2014-11-16	Urine	SC2	Primary	0
30585	Pseudomonas aeruginosa	GCA_024716595.1	ASM2471659v1	53	ER	1	Main	2015-06-07	Urine	SC2	Primary	1
427146	Pseudomonas aeruginosa	GCA_024715715.1	ASM2471571v1	67	ER	1	Main	2016-09-04	Urine	N/A	Primary	0
443038	Pseudomonas aeruginosa	GCA_024715565.1	ASM2471556v1	71	ER	1	Main	2017-01-09	Blood	SC2	Primary	0
435279	Pseudomonas aeruginosa	GCA_024715635.1	ASM2471563v1	70	ER	1	Main	2016-11-21	Urine	SC2	Primary: Environmental Transmission	0
18852	Pseudomonas aeruginosa	GCA_024718945.1	ASM2471894v1	27	ER	1	Main	2013-09-16	Urine	SC2	Serial	0
20737	Pseudomonas aeruginosa	GCA_024718755.1	ASM2471875v1	35	ER	1	Main	2014-02-09	Urine	SC2	Serial	0
21279	Pseudomonas aeruginosa	GCA_024718715.1	ASM2471871v1	35	ER	1	Main	2014-03-03	Urine	SC2	Serial	0
29287	Pseudomonas aeruginosa	GCA_024716645.1	ASM2471664v1	35	ER	1	Main	2015-03-09	Urine	SC2	Serial	0
33071	Pseudomonas aeruginosa	GCA_024716355.1	ASM2471635v1	27	ER	1	Main	2015-08-06	Respiratory	SC2	Serial	0
391504	Pseudomonas aeruginosa	GCA_024715935.1	ASM2471593v1	60	ER	1	Main	2016-04-16	Urine	SC2	Serial	0
406532	Pseudomonas aeruginosa	GCA_024715845.1	ASM2471584v1	49	ER	1	Main	2016-05-18	Urine	SC2	Serial	0
415901	Pseudomonas aeruginosa	GCA_024715775.1	ASM2471577v1	35	ER	1	Main	2016-08-14	Urine	SC2	Serial	0
427173	Pseudomonas aeruginosa	GCA_024715655.1	ASM2471565v1	35	ER	1	Main	2016-09-08	Urine	SC2	Serial	0
435330	Pseudomonas aeruginosa	GCA_024715615.1	ASM2471561v1	10	ER	1	Main	2016-11-26	Urine	SC1	Serial	0
444019	Pseudomonas aeruginosa	GCA_024715555.1	ASM2471555v1	35	ER	1	Main	2016-12-20	Urine	SC2	Serial	0
444046	Pseudomonas aeruginosa	GCA_024715495.1	ASM2471549v1	35	ER	1	Main	2017-01-01	Urine	SC2	Serial	0
451824	Pseudomonas aeruginosa	GCA_024715465.1	ASM2471546v1	35	ER	1	Main	2017-02-02	Urine	SC2	Serial	0
451833	Pseudomonas aeruginosa	GCA_024715455.1	ASM2471545v1	35	ER	1	Main	2017-02-02	Urine	SC2	Serial	0
451930	Pseudomonas aeruginosa	GCA_024715415.1	ASM2471541v1	69	ER	1	Main	2017-02-05	Urine	SC2	Serial	0
470670	Pseudomonas aeruginosa	GCA_024715275.1	ASM2471527v1	10	ER	1	Main	2017-05-05	Urine	SC1	Serial	0
473400	Pseudomonas aeruginosa	GCA_024715215.1	ASM2471521v1	10	ER	1	Main	2017-05-19	Urine	SC1	Serial	0
540924	Pseudomonas aeruginosa	GCA_024715075.1	ASM2471507v1	35	ER	1	Main	2017-12-24	Urine	SC2	Serial	0
540933	Pseudomonas aeruginosa	GCA_024715055.1	ASM2471505v1	35	ER	1	Main	2017-12-24	Urine	SC2	Serial	0
546502	Pseudomonas aeruginosa	GCA_024715035.1	ASM2471503v1	10	ER	1	Main	2018-01-17	Urine	SC1	Serial	0
552877	Pseudomonas aeruginosa	GCA_024714985.1	ASM2471498v1	35	ER	1	Main	2018-01-28	Urine	SC2	Serial	0
16390	Pseudomonas aeruginosa	GCA_024719105.1	ASM2471910v1	31	N/A	-	N/A	2013-04-22	Surveillance	SC1	Serial	0
16391	Pseudomonas aeruginosa	GCA_024719125.1	ASM2471912v1	31	N/A	-	N/A	2013-04-22	Surveillance	SC1	Serial	0
30583	Pseudomonas aeruginosa	GCA_024716615.1	ASM2471661v1	51	N/A	-	N/A	2015-06-01	Urine	SC1	Serial	0
30985	Pseudomonas aeruginosa	GCA_024716495.1	ASM2471649v1	53	N/A	-	N/A	2015-06-28	Urine	SC2	Serial	0
506948	Pseudomonas aeruginosa	GCA_024715145.1	ASM2471514v1	73	N/A	1	Main	2017-09-19	Urine	SC2	Primary	0
